# Supplementary material for: Perceptions and Patterns in Academic Publishing: A Survey of United States Residents in Radiation Oncology
Source: PubMed Central journal article supplement — Adv Radiat Oncol. 2019 Sep 10;5(2):146–51. doi: 10.1016/j.adro.2019.09.001 (PMC7136641; doi:10.1016/j.adro.2019.09.001), 2019-09-10
Supplement: mmc1.pdf [file mmc1.pdf]

## **“Perceptions and Patterns in Academic Publishing” Survey**

**1. What is your current PGY level?**

PGY2  
PGY3  
PGY4  
PGY5

**2. In what state are you currently training?**

Fill in the blank question

**3. How many residents are in your training program?**

1–6  
7–10  
11–16  
>16

**4. How many manuscripts have you published in peer-reviewed journals?**

0  
1–5  
5–10  
10–15  
>15

**5. Have you received any formal training regarding manuscript preparation and choice of academic journal for submission?**

Yes  
No

**6. Many journals now charge varying fees for review, processing, and publication costs. When such costs are high (>\$500) does this suggest that the journal is:**

Of high quality  
Of potentially low or suspect quality  
Either of the above  
Neither of the above

**7. Have cost considerations ever made you choose one journal over another for submission?**

Never  
Once  
More than once

**8. Have you ever published in a journal with higher publication fees after your article was rejected by a first-choice journal?**

Never  
Once

More than once

**9. Have you ever submitted to a journal that sends you copies of their publications, without ever having enrolled for subscription?**

Yes

No

## **REVIEW PROCESS AND TIMELINE**

**10. How long would you expect editors to take to complete a proper peer review, comment upon, and return your submission?**

<2 weeks

2 weeks–1 month

1–3 months

3–6 months

>6 months

**11. Once final submission is made, how long would you expect to wait for publication (either online or in print)?**

<2 weeks

2 weeks–1 month

1–3 months

3–6 months

>6 months

**12. Which of the following would you be most wary of when submitting?**

An unusually short time for review

An unusually long time for review

An unusually short time to publication

An unusually long time to publication

None of the above

All of the above

## **JOURNAL/PUBLISHER OPERATIONS**

**13. How important is an aesthetically pleasing, streamlined website interface for a given journal or publisher?**

Not important at all

Not very important

Neither important or unimportant

Somewhat important

Very important

**14. How important is it for you to know who is on the editorial board for a given journal or publisher?**

Not important at all

Not very important

Neither important nor unimportant

Somewhat important

Very important

**15. How important is it to you that a given journal operates in connection with a reputable publisher and/or professional or scientific organization?**

Not important at all

Not very important

Neither important or unimportant

Somewhat important

Very important

**16. Have you ever submitted an article to a journal in response to a direct e-mail solicitation from a publisher?**

Once

More than once

Never

**17. Before you select a journal for submission, do you check to see if the journal and its publisher are included in lists of so-called “predatory” groups?**

Always

Sometimes

Never

Do not know how to do so

**18. Does your department/institution, have any guidelines or proscriptions about publication in so-called “predatory” journals?**

Yes

No

Do not know

## **RANKING**

**19. Please rank the following factors, in order of most to least important when choosing a given journal or publisher:**

[ ] Amount/quality of comments and suggestions provided by reviewers/editors.

[ ] Association with a reputable professional or scientific organization.

[ ] Costs associated with submission and publication.

[ ] Impact factor of journal.

[ ] Length of time the journal has been indexed.

[ ] Name recognition of members on the editorial board.

[ ] Time required for review/response/publication.

- Quality/appropriateness of journal transactions (website, e-mail communications, phone calls, etc.)
- Whether the journal is indexed in PubMed and/or other major scientific indexes.
